# Supplementary material for: Maltodextrin-Based Carbohydrate Oral Rinsing and Exercise Performance: Systematic Review and Meta-Analysis
Source: PubMed Central journal article supplement (PMC9325805; doi:10.1007/s40279-022-01658-3), 2022-03-03
Supplement: 40279_2022_1658_MOESM1_ESM.pdf [file 40279_2022_1658_MOESM1_ESM.pdf]

## Online Resource 1

**Title:** Maltodextrin Based, Carbohydrate Oral Rinsing and Exercise Performance: Systematic Review and Meta-Analysis

**Journal:** Sports Medicine

**Authors:** Claudia Hartley<sup>1</sup>, Amelia Carr<sup>2</sup>, Steven J. Bowe<sup>3</sup>, Wender L.P. Bredie<sup>4</sup>, Russell S.J. Keast<sup>1</sup>

1 CASS Food Research Centre, Deakin University, Burwood Highway, Burwood, VIC 3125, Australia; [c.hartley@deakin.edu.au](mailto:c.hartley@deakin.edu.au) (C.H.); [russell.keast@deakin.edu.au](mailto:russell.keast@deakin.edu.au) (R.S.J.K.)

2 Centre for Sport Research, Deakin University, Burwood Highway, Burwood, VIC 3125, Australia; [amelia.carr@deakin.edu.au](mailto:amelia.carr@deakin.edu.au) (A.C.)

3 Deakin Biostatistics Unit, Faculty of Health, Deakin University, Burwood Highway, Burwood, VIC 3125, Australia; [s.bowe@deakin.edu.au](mailto:s.bowe@deakin.edu.au) (S.J.B.)

4 Department of Food Science, University of Copenhagen, Rolighedsvej 26, 1958 Frederiksberg C; [wb@food.ku.dk](mailto:wb@food.ku.dk) (W.L.P.B.)

### Correspondence:

Professor Russell SJ Keast

Email: [russell.keast@deakin.edu.au](mailto:russell.keast@deakin.edu.au)

## Online Resource 1: Quality assessment of studies included in the systematic review.

This Online Resource details the Quality Assessment performed of the studies included in this systematic review.

| Study                          | Research Question   |                   | Participant Selection    |                              |                         | Intervention              |               | Blinding               |                    | Withdrawals       |                     | Outcomes         |                       | Conclusions                   |                        | Funding                 |                        |                              |                        |                                 |
|--------------------------------|---------------------|-------------------|--------------------------|------------------------------|-------------------------|---------------------------|---------------|------------------------|--------------------|-------------------|---------------------|------------------|-----------------------|-------------------------------|------------------------|-------------------------|------------------------|------------------------------|------------------------|---------------------------------|
|                                | Intervention stated | Outcome(s) stated | Target population stated | Inclusion/Exclusion criteria | Demographic Information | Representative population | Randomisation | Methods clearly stated | Protocol described | Setting described | Researchers blinded | Subjects blinded | Number of withdrawals | Reasons for withdrawal stated | Based on valid methods | Measurements consistent | Discussion of findings | Biases/limitations discussed | Affiliations disclosed | Conflicts of interest disclosed |
| Andersson et al. [39]          | ✓                   | ✓                 | ✓                        | ✓x                           | ✓                       | ✓                         | ✓             | ✓                      | ✓                  | ✓                 | x                   | ✓                | NS                    | NS                            | ✓                      | ✓                       | ✓                      | x                            | NS                     | x                               |
| Ataide-Silva et al. [29]       | ✓                   | ✓                 | ✓                        | ✓x                           | ✓                       | ✓                         | ✓             | ✓                      | ✓                  | ✓                 | ✓                   | ✓                | NS                    | NS                            | ✓                      | ✓                       | ✓                      | x                            | ✓                      | ✓                               |
| Bailey et al. [68]             | ✓                   | ✓                 | ✓                        | ✓                            | ✓                       | ✓                         | ✓             | ✓x                     | ✓                  | ✓                 | ✓                   | ✓                | NS                    | NS                            | NS                     | ✓                       | ✓                      | ✓                            | NS                     | x                               |
| Bastos-Silva et al. [69]       | ✓                   | ✓                 | ✓                        | ✓                            | ✓                       | ✓                         | ✓             | ✓                      | ✓                  | NS                | ✓                   | ✓                | NS                    | NS                            | ✓                      | ✓                       | ✓                      | ✓                            | NS                     | ✓                               |
| Bavaresco Gambassi et al. [30] | ✓                   | ✓                 | ✓                        | ✓x                           | ✓                       | ✓                         | ✓             | ✓                      | ✓                  | ✓                 | ✓                   | ✓                | NS                    | NS                            | NS                     | ✓                       | ✓                      | x                            | NS                     | ✓                               |
| Bazzucchi et al. [2]           | ✓                   | ✓                 | ✓                        | ✓x                           | ✓                       | ✓                         | ✓             | ✓                      | ✓                  | ✓                 | ✓                   | ✓                | NS                    | NS                            | ✓                      | ✓                       | ✓                      | x                            | ✓                      | x                               |
| Beelen et al. [40]             | ✓                   | ✓                 | ✓                        | ✓x                           | ✓                       | ✓                         | ✓             | ✓                      | ✓                  | ✓                 | ✓                   | ✓                | NS                    | NS                            | ✓                      | ✓                       | ✓                      | x                            | NS                     | x                               |
| Black et al. [70]              | ✓                   | ✓                 | ✓                        | ✓x                           | ✓                       | ✓                         | ✓             | ✓                      | ✓                  | x                 | ✓                   | ✓                | NS                    | NS                            | ✓x                     | ✓                       | ✓                      | x                            | NS                     | ✓                               |
| Carter et al. [28]             | ✓                   | ✓                 | ✓                        | ✓x                           | ✓                       | ✓                         | NS            | ✓                      | ✓                  | ✓                 | NS                  | ✓                | NS                    | NS                            | ✓                      | ✓                       | ✓                      | x                            | NS                     | x                               |
| Chambers et al. [19]           | ✓                   | ✓                 | ✓                        | x                            | ✓                       | ✓                         | ✓             | ✓                      | ✓                  | ✓                 | ✓                   | ✓                | NS                    | NS                            | ✓                      | ✓                       | ✓                      | ✓                            | NS                     | x                               |
| Cherif et al. [41]             | ✓                   | ✓                 | ✓                        | x                            | ✓                       | ✓                         | ✓             | ✓                      | ✓                  | ✓                 | x                   | ✓                | NS                    | NS                            | ✓                      | ✓                       | ✓                      | ✓                            | NS                     | ✓                               |
| Chong et al. [42]              | ✓                   | ✓                 | ✓                        | x                            | ✓                       | ✓                         | ✓             | ✓                      | ✓                  | ✓                 | ✓                   | ✓                | NS                    | NS                            | NS                     | ✓                       | ✓                      | x                            | ✓                      | ✓                               |
| Clarke et al. [71]             | ✓                   | ✓                 | ✓                        | ✓x                           | ✓                       | ✓                         | ✓             | ✓                      | ✓                  | x                 | ✓                   | ✓                | NS                    | NS                            | ✓                      | ✓                       | ✓                      | x                            | NS                     | x                               |
| Clarke et al. [72]             | ✓                   | ✓                 | ✓                        | ✓x                           | ✓                       | ✓                         | ✓             | ✓                      | ✓                  | ✓x                | NS                  | NS               | NS                    | NS                            | ✓                      | ✓                       | ✓                      | ✓                            | NS                     | ✓                               |
| Clarke et al. [73]             | ✓                   | ✓                 | ✓                        | ✓x                           | ✓                       | ✓                         | ✓             | ✓                      | ✓                  | x                 | ✓                   | ✓                | NS                    | NS                            | ✓                      | ✓                       | ✓                      | ✓                            | NS                     | x                               |
| Cramer et al. [74]             | ✓                   | ✓                 | ✓                        | ✓x                           | ✓                       | ✓                         | NS            | ✓                      | ✓                  | ✓                 | ✓                   | ✓                | NS                    | NS                            | ✓                      | ✓                       | ✓                      | ✓                            | NS                     | ✓                               |
| de Oliveira et al. [75]        | ✓                   | ✓                 | ✓x                       | ✓                            | ✓                       | ✓                         | ✓             | ✓x                     | ✓x                 | ✓x                | ✓                   | ✓                | NS                    | NS                            | ✓x                     | ✓                       | ✓                      | x                            | ✓x                     | x                               |
| Decimoni et al. [38]           | ✓                   | ✓                 | ✓                        | ✓                            | ✓                       | ✓                         | ✓             | ✓                      | ✓                  | ✓                 | ✓                   | ✓                | NS                    | NS                            | ✓                      | ✓                       | ✓                      | x                            | NS                     | ✓                               |
| Deighton et al. [76]           | ✓                   | ✓                 | ✓                        | ✓x                           | ✓                       | ✓                         | NS            | ✓                      | ✓                  | ✓                 | ✓                   | ✓                | NS                    | NS                            | ✓                      | ✓                       | ✓                      | ✓                            | NS                     | ✓                               |
| Dorling, Earnest [43]          | ✓                   | ✓                 | ✓                        | ✓                            | ✓                       | ✓                         | ✓             | ✓                      | ✓                  | x                 | ✓                   | ✓                | NS                    | NS                            | ✓                      | ✓                       | ✓                      | ✓                            | NS                     | ✓                               |
| Dunkin, Phillips [44]          | ✓                   | ✓                 | ✓                        | ✓x                           | ✓                       | ✓                         | ✓             | ✓                      | ✓                  | x                 | x                   | ✓                | NS                    | NS                            | ✓                      | ✓                       | ✓                      | ✓                            | ✓                      | ✓                               |
| Durkin et al. [77]             | ✓                   | ✓                 | ✓                        | ✓                            | ✓                       | ✓                         | NS            | ✓                      | ✓                  | ✓                 | x                   | ✓                | NS                    | NS                            | ✓                      | ✓                       | ✓                      | ✓                            | NS                     | ✓                               |
| Fares, Kayser [31]             | ✓                   | ✓                 | ✓                        | ✓                            | x                       | ✓                         | ✓             | ✓                      | ✓                  | ✓                 | NS                  | ✓                | NS                    | NS                            | ✓                      | ✓                       | ✓                      | x                            | NS                     | ✓                               |
| Gam et al. [45]                | ✓                   | ✓                 | ✓                        | ✓x                           | ✓                       | ✓                         | ✓             | ✓                      | ✓                  | ✓                 | NS                  | ✓                | NS                    | NS                            | ✓                      | ✓                       | ✓                      | x                            | NS                     | x                               |

|                          |   |   |   |    |   |   |    |   |   |    |    |   |   |    |    |    |   |   |   |    |    |
|--------------------------|---|---|---|----|---|---|----|---|---|----|----|---|---|----|----|----|---|---|---|----|----|
| Green et al. [78]        | ✓ | ✓ | ✓ | ✓x | ✓ | ✓ | ✓  | ✓ | ✓ | ✓  | x  | ✓ | ✓ | NS | NS | ✓  | ✓ | ✓ | ✓ | NS | ✓x |
| Jeffers et al. [46]      | ✓ | ✓ | ✓ | ✓x | ✓ | ✓ | ✓  | ✓ | ✓ | ✓  | ✓  | ✓ | ✓ | NS | NS | ✓  | ✓ | ✓ | x | NS | ✓  |
| Jensen et al. [79]       | ✓ | ✓ | ✓ | ✓x | ✓ | ✓ | ✓  | ✓ | ✓ | ✓  | ✓  | ✓ | ✓ | NS | NS | ✓  | ✓ | ✓ | x | NS | ✓  |
| Lane et al. [32]         | ✓ | ✓ | ✓ | ✓x | ✓ | ✓ | NS | ✓ | ✓ | ✓  | ✓  | ✓ | ✓ | NS | NS | ✓  | ✓ | ✓ | x | ✓  | x  |
| Phillips et al. [80]     | ✓ | ✓ | ✓ | ✓x | ✓ | ✓ | ✓  | ✓ | ✓ | ✓  | ✓  | ✓ | ✓ | NS | NS | ✓  | ✓ | ✓ | x | ✓  | x  |
| Přibyslavská et al. [81] | ✓ | ✓ | ✓ | ✓x | ✓ | ✓ | NS | ✓ | ✓ | ✓x | ✓  | ✓ | ✓ | NS | NS | ✓  | ✓ | ✓ | ✓ | NS | x  |
| Rollo et al. [82]        | ✓ | ✓ | ✓ | ✓x | ✓ | ✓ | ✓  | ✓ | ✓ | ✓  | ✓  | ✓ | ✓ | NS | NS | ✓  | ✓ | ✓ | ✓ | ✓  | ✓  |
| Rossato et al. [83]      | ✓ | ✓ | ✓ | ✓  | ✓ | ✓ | ✓  | ✓ | ✓ | ✓x | ✓  | ✓ | ✓ | NS | NS | ✓  | ✓ | ✓ | ✓ | ✓  | ✓  |
| Simpson et al. [84]      | ✓ | ✓ | ✓ | ✓x | ✓ | ✓ | ✓  | ✓ | ✓ | ✓  | ✓  | ✓ | ✓ | NS | NS | NS | ✓ | ✓ | ✓ | ✓  | ✓  |
| Sinclair et al. [85]     | ✓ | ✓ | ✓ | ✓x | ✓ | ✓ | NS | ✓ | ✓ | ✓x | NS | ✓ | ✓ | NS | NS | ✓  | ✓ | ✓ | ✓ | NS | x  |
| Whitham, McKinney [86]   | ✓ | ✓ | ✓ | ✓x | ✓ | ✓ | ✓  | ✓ | ✓ | ✓x | ✓  | ✓ | ✓ | NS | NS | ✓  | ✓ | ✓ | x | NS | x  |

✓ yes (item adequately addressed); x no (item not adequately addressed); ✓x partially (item partially addressed); NS not stated

\*Quality Assessment based on a modified version of the Quality Criteria Checklist: Primary Research [63]

## Reference List:

2. Bazzucchi I, Patrizio F, Felici F, Nicolò A, Sacchetti M. Carbohydrate Mouth Rinsing: Improved Neuromuscular Performance During Isokinetic Fatiguing Exercise. *Int J Sports Physiol Perform*. 2017;12(8):1031-8. doi:10.1123/ijsp.2016-0583.
19. Chambers ES, Bridge MW, Jones DA. Carbohydrate sensing in the human mouth: effects on exercise performance and brain activity. *The Journal of physiology*. 2009;587(Pt 8):1779-94. doi:10.1113/jphysiol.2008.164285.
28. Carter JM, Jeukendrup AE, Jones DA. The effect of carbohydrate mouth rinse on 1-h cycle time trial performance. *Med Sci Sports Exerc*. 2004;36(12):2107-11. doi:10.1249/01.mss.0000147585.65709.6f.
29. Ataide-Silva T, Ghiarone T, Bertuzzi R, Stathis CG, Leandro CG, Lima-Silva AE. CHO Mouth Rinse Ameliorates Neuromuscular Response with Lower Endogenous CHO Stores. *Med Sci Sports Exerc*. 2016;48(9):1810-20. doi:10.1249/mss.0000000000000973.
30. Bavaresco Gambassi B, Gomes de Santana Barros Leal Y, Pinheiro Dos Anjos ER, Antonelli BA, Gomes Goncalves ESDC, Hermes Pires de Melo Montenegro I et al. Carbohydrate mouth rinse improves cycling performance carried out until the volitional exhaustion. *J Sports Med Phys Fitness*. 2019;59(1):1-5. doi:10.23736/s0022-4707.17.07980-4.
31. Fares EJ, Kayser B. Carbohydrate mouth rinse effects on exercise capacity in pre- and postprandial States. *J Nutr Metab*. 2011;2011:385962. doi:10.1155/2011/385962.
32. Lane SC, Bird SR, Burke LM, Hawley JA. Effect of a carbohydrate mouth rinse on simulated cycling time-trial performance commenced in a fed or fasted state. *Appl Physiol Nutr Metab*. 2013;38(2):134-9. doi:10.1139/apnm-2012-0300.
39. Andersson H, Knight A, Buscombe R, Sinclair J, Edmonds CJ, Bottoms L. The effect of carbohydrate mouth rinse on a 30-minute arm cranking performance. *Comp Exerc Physiol*. 2016;12(1):41-7. doi:10.3920/CEP150032.
40. Beelen M, Berghuis J, Bonaparte B, Ballak SB, Jeukendrup AE, van Loon LJ. Carbohydrate mouth rinsing in the fed state: lack of enhancement of time-trial performance. *Int J Sport Nutr Exerc Metab*. 2009;19(4):400-9. doi:10.1123/ijsnem.19.4.400.
41. Cherif A, Meeusen R, Ryu J, Taylor L, Farooq A, Kammoun K et al. Repeated-sprints exercise in daylight fasting: carbohydrate mouth rinsing does not affect sprint and reaction time performance. *Biol Sport*. 2018;35(3):237-44. doi:10.5114/biolSport.2018.77824.

42. Chong E, Guelfi KJ, Fournier PA. Effect of a carbohydrate mouth rinse on maximal sprint performance in competitive male cyclists. *J Sci Med Sport*. 2011;14(2):162-7. doi:10.1016/j.jsams.2010.08.003.
43. Dorling JL, Earnest CP. Effect of carbohydrate mouth rinsing on multiple sprint performance. *J Int Soc Sports Nutr*. 2013;10(1):41. doi:10.1186/1550-2783-10-41.
44. Dunkin JE, Phillips SM. The Effect of a Carbohydrate Mouth Rinse on Upper-Body Muscular Strength and Endurance. *J Strength Cond Res*. 2017;31(7):1948-53. doi:10.1519/jsc.0000000000001668.
45. Gam S, Guelfi KJ, Fournier PA. Opposition of Carbohydrate in a Mouth-Rinse Solution to the Detrimental Effect of Mouth Rinsing During Cycling Time Trials. *Int J Sport Nutr Exerc Metab*. 2013;23(1):48.
46. Jeffers R, Shave R, Ross E, Stevenson EJ, Goodall S. The effect of a carbohydrate mouth-rinse on neuromuscular fatigue following cycling exercise. *Appl Physiol Nutr Metab*. 2015;40(6):557-64.
63. Higgins JPT, Altman DG, Gøtzsche PC, Jüni P, Moher D, Oxman AD et al. The Cochrane Collaboration's tool for assessing risk of bias in randomised trials. *BMJ*. 2011;343:d5928. doi:10.1136/bmj.d5928.
68. Bailey SP, Hibbard J, La Forge D, Mitchell M, Roelands B, Harris GK et al. Impact of a Carbohydrate Mouth Rinse on Quadriceps Muscle Function and Corticomotor Excitability. *International Journal of Sports Physiology & Performance*. 2019;14(7):927-33.
69. Bastos-Silva VJ, Prestes J, Geraldies AAR. Effect of Carbohydrate Mouth Rinse on Training Load Volume in Resistance Exercises. *Journal of strength and conditioning research*. 2019;33(6):1653-7. doi:10.1519/JSC.0000000000002092.
70. Black CD, Schubert DJ, Szczyglowski MK, Wren JD. Carbohydrate Mouth Rinsing Does Not Prevent the Decline in Maximal Strength After Fatiguing Exercise. *Journal of Strength & Conditioning Research*. 2018;32(9):2466-73.
71. Clarke ND, Kornilios E, Richardson DL. Carbohydrate and Caffeine Mouth Rinses Do Not Affect Maximum Strength and Muscular Endurance Performance. *Journal of strength and conditioning research*. 2015;29(10):2926-31. doi:10.1519/JSC.0000000000000945.
72. Clarke ND, Hammond S, Kornilios E, Mundy PD. Carbohydrate mouth rinse improves morning high-intensity exercise performance. *European Journal of Sport Science*. 2017;17(8):955-63.

73. Clarke ND, Thomas JR, Kagka M, Ramsbottom R, Delestrat A. No Dose-Response Effect of Carbohydrate Mouth Rinse Concentration on 5-km Running Performance in Recreational Athletes. *Journal of strength and conditioning research*. 2017;31(3):715-20. doi:10.1519/JSC.0000000000001531.
74. Cramer MN, Thompson MW, Périard JD. Thermal and Cardiovascular Strain Mitigate the Potential Benefit of Carbohydrate Mouth Rinse During Self-Paced Exercise in the Heat. *Frontiers in physiology*. 2015;6:354. doi:10.3389/fphys.2015.00354.
75. de Oliveira JJ, de Souza Salles AH, Reis Barbosa CG, de Oliveira Silva JA, de Melo Dias R, Silva Vilela Ribeiro AG et al. Effect of Post-Activation Potentiation and Carbohydrate Mouth Rinse on Repeated Sprint Ability in University Futsal Players. *Journal of Exercise Physiology Online*. 2020;23(2):29-40.
76. Deighton K, Duckworth L, Matu J, Suter M, Fletcher C, Stead S et al. Mouth rinsing with a sweet solution increases energy expenditure and decreases appetite during 60 min of self-regulated walking exercise. *Applied Physiology, Nutrition and Metabolism*. 2016;41(12):1255-61.
77. Durkin M, Akeroyd H, Holliday A. Carbohydrate mouth rinse improves resistance exercise capacity in the glycogen-lowered state. *Applied Physiology, Nutrition & Metabolism*. 2021;46(2):126-32.
78. Green MS, Kimmel CS, Martin TD, Mouser JG, Brune MP. Effect of Carbohydrate Mouth Rinse on Resistance Exercise Performance. *Journal of strength and conditioning research*. 2020. doi:10.1519/JSC.0000000000003755.
79. Jensen M, Stellingwerff T, Klimstra M. Carbohydrate mouth rinse counters fatigue related strength reduction. *International Journal of Sport Nutrition and Exercise Metabolism*. 2015;25(3):252-61. doi:10.1123/ijsnem.2014-0061.
80. Phillips SM, Findlay S, Kavaliuskas M, Grant MC. The influence of serial carbohydrate mouth rinsing on power output during a cycle sprint. *Journal of Sports Science and Medicine*. 2014;13(2):252-8.
81. Přibyslavská V, Scudamore EM, Johnson SL, Green JM, Stevenson Wilcoxson MC, Lowe JB et al. Influence of carbohydrate mouth rinsing on running and jumping performance during early morning soccer scrimmaging. *European journal of sport science*. 2016;16(4):441-7. doi:10.1080/17461391.2015.1020345.
82. Rollo I, Homewood G, Williams C, Carter J, Goosey-Tolfrey VL. The Influence of Carbohydrate Mouth Rinse on Self-Selected Intermittent Running Performance. *Int J Sport Nutr Exerc Metab*. 2015;25(6):550.
83. Rossato LT, Fernandes CTM, Vieira PF, de Branco FMS, Nahas PC, Puga GM et al. No Improvement in Running Time to Exhaustion at 100% VO<sub>2</sub>max in Recreationally Active Male Runners With a Preexercise Single-Carbohydrate Mouth Rinse. *International journal of sports physiology and performance*. 2019:1178-83. doi:10.1123/ijsp.2018-0624.

84. Simpson GW, Pritchett R, O'Neal E, Hoskins G, Pritchett K. Carbohydrate Mouth Rinse Improves Relative Mean Power During Multiple Sprint Performance. *International journal of exercise science*. 2018;11(6):754-63.
85. Sinclair J, Bottoms L, Flynn C, Bradley E, Alexander G, McCullagh S et al. The effect of different durations of carbohydrate mouth rinse on cycling performance. *European journal of sport science*. 2014;14(3):259-64. doi:10.1080/17461391.2013.785599.
86. Whitham M, McKinney J. Effect of a carbohydrate mouthwash on running time-trial performance. *Journal of Sports Sciences*. London; UK: Taylor & Francis; 2007. p. 1385-92.
